# Supplementary material
Source: publisher figshare collection journal article supplement (https://acs.figshare.com/ndownloader/files/4545868)
Supplement: Supplementary file 1 [file 4545868]

**Facile deferration of commercial fertilizers containing iron chelates  
for their NMR analysis**

Luca Laghi,<sup>†</sup> Sara Alcaniz,<sup>‡</sup> Mar Cerdà,<sup>‡</sup> Mar Gomez-Gallego,<sup>◇</sup> Miguel Angel Sierra,<sup>◇</sup>  
Giuseppe Placucci<sup>†</sup> and Mauro Andrea Cremonini<sup>†\*</sup>

<sup>†</sup> Department of Food Science, University of Bologna, P.zza Goidanich 60, 47023  
Cesena, Italy

<sup>‡</sup> Department of Agrochemistry and Biochemistry, Faculty of Sciences, University of  
Alicante, 03080 Campus de San Vicente del Raspeig, Alicante, Spain

<sup>◇</sup> Departamento de Química Orgánica, Facultad de Química, Universidad Complutense,  
28040, Madrid, Spain.

\*Corresponding Author: Telephone: +390547338106

Fax: +390547382348

E-mail: mauro.cremonini@unibo.it

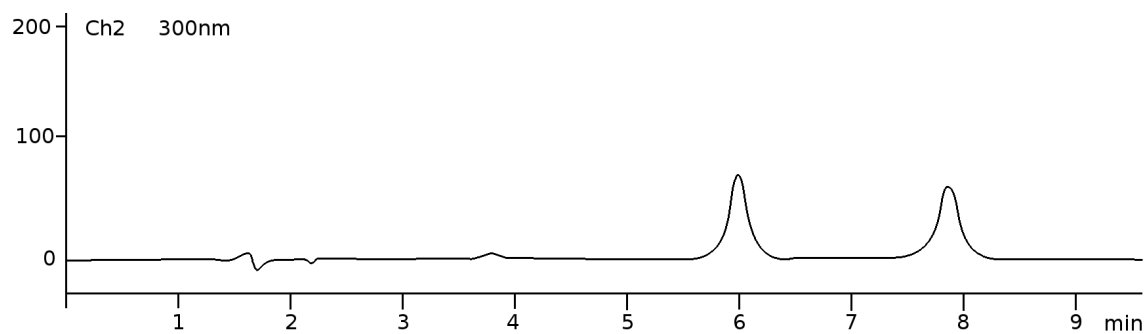

Figure 1. HPLC chromatogram of sample A.

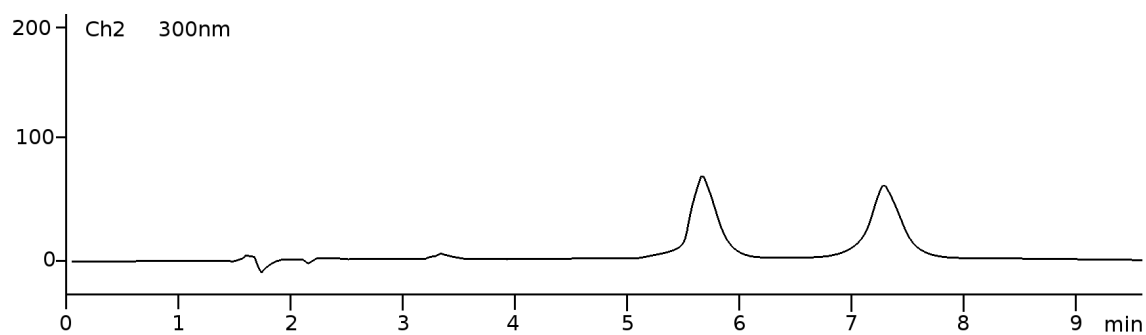

Figure 2. HPLC chromatogram of sample B.

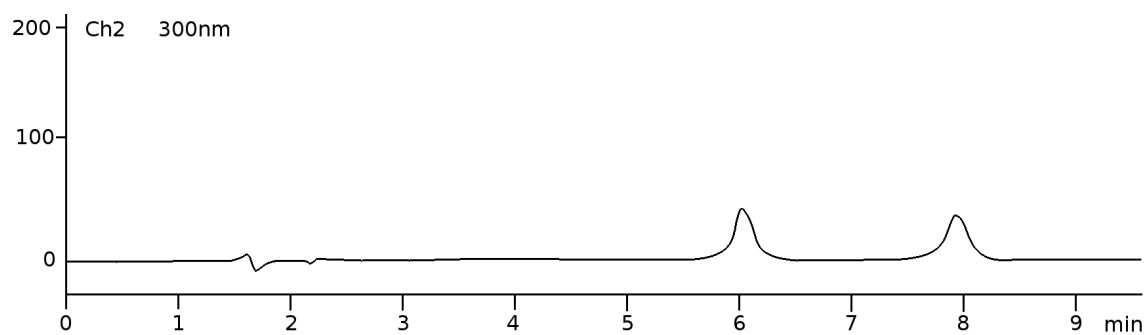

Figure 3. HPLC chromatogram of sample C.

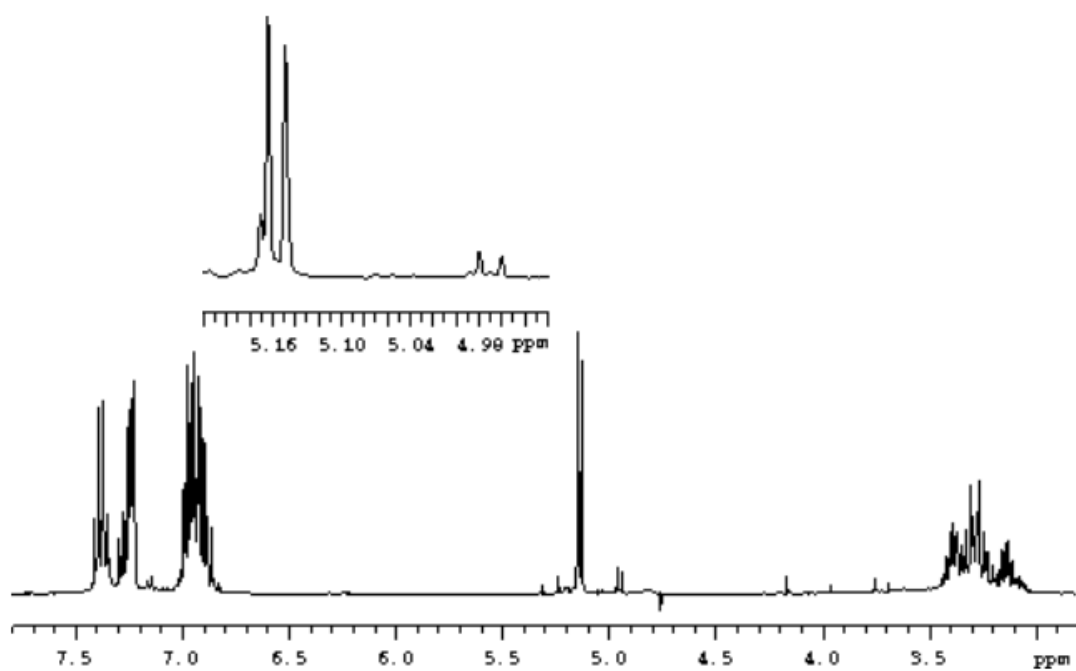

Figure 4.  $^1\text{H}$ -NMR spectrum of sample B after deferration.

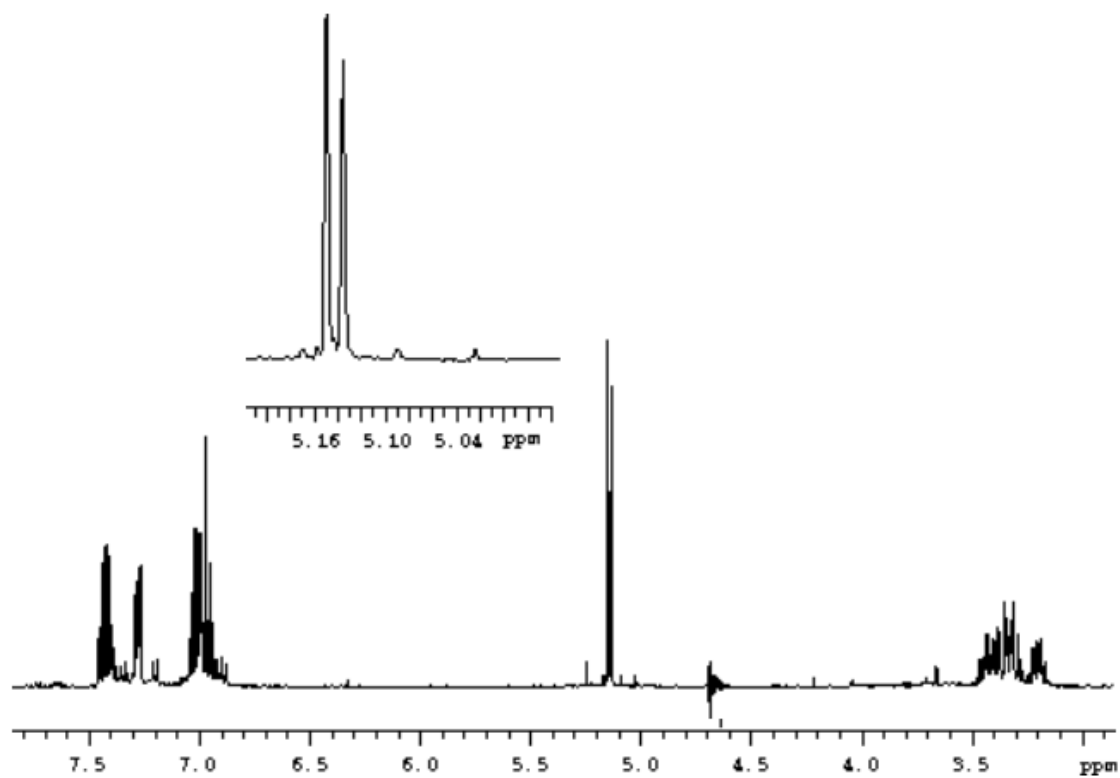

Figure 5.  $^1\text{H}$ -NMR spectrum of sample C after deferration.

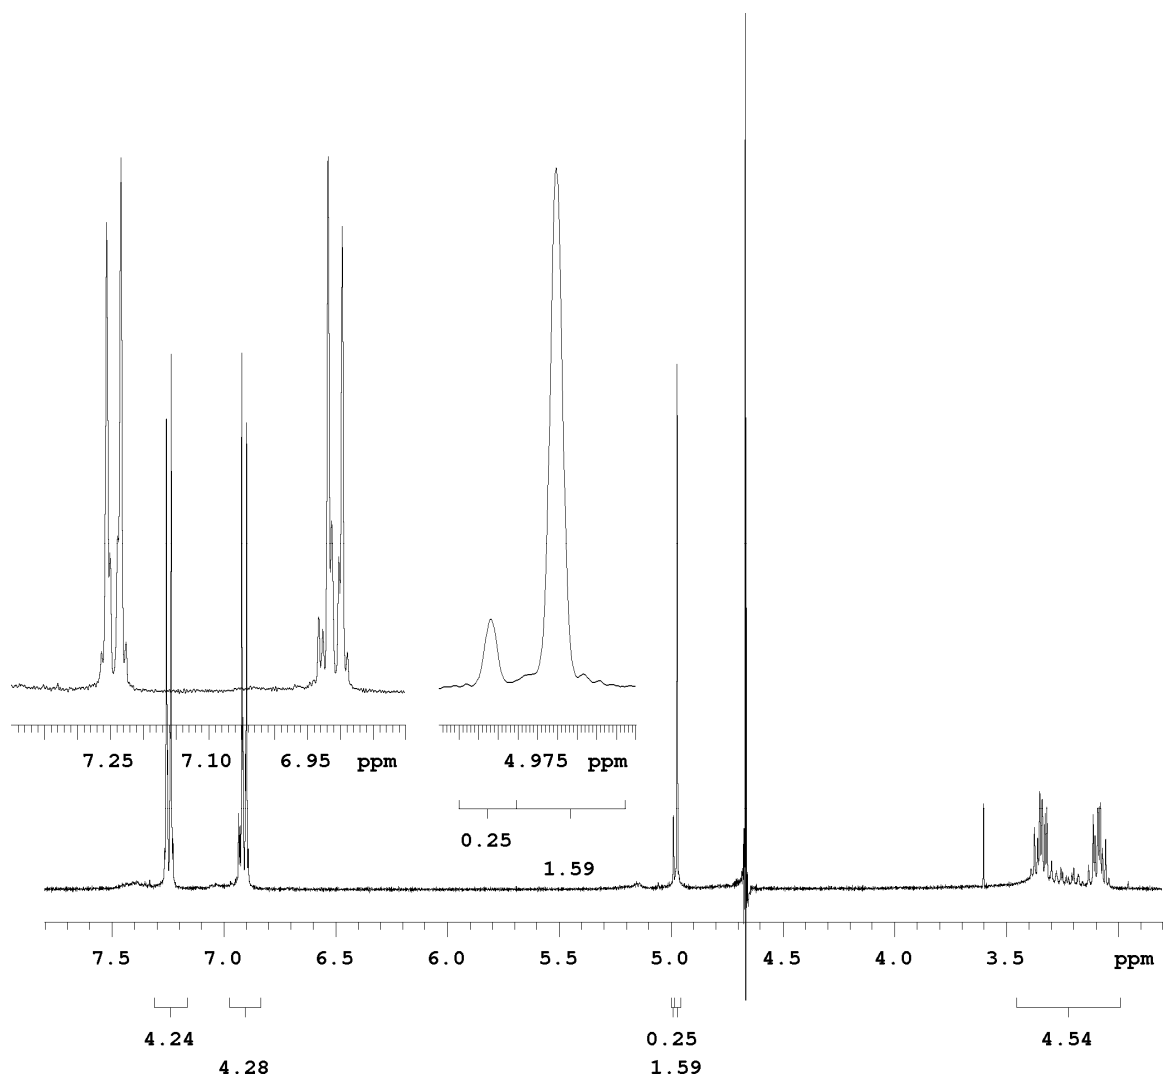

Figure 6.  $^1\text{H}$ -NMR spectrum of *p,p*-EDDHA.

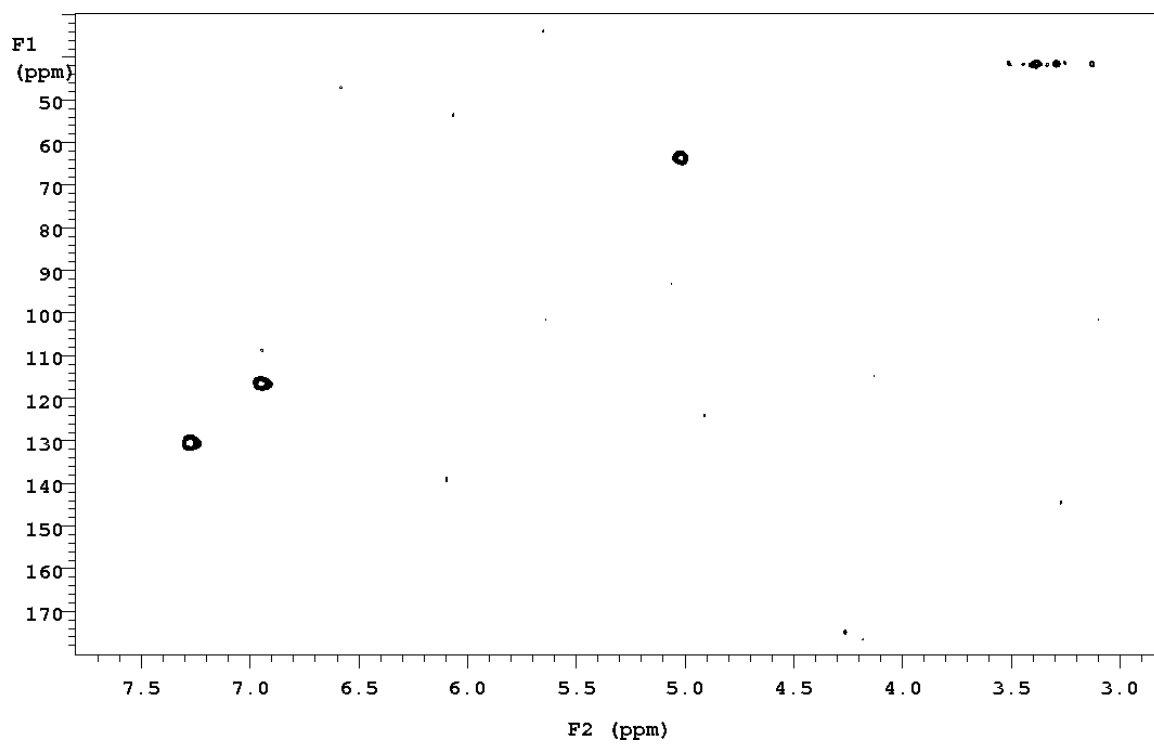

Figure 7. gHSQC spectrum of *p,p*-EDDHA

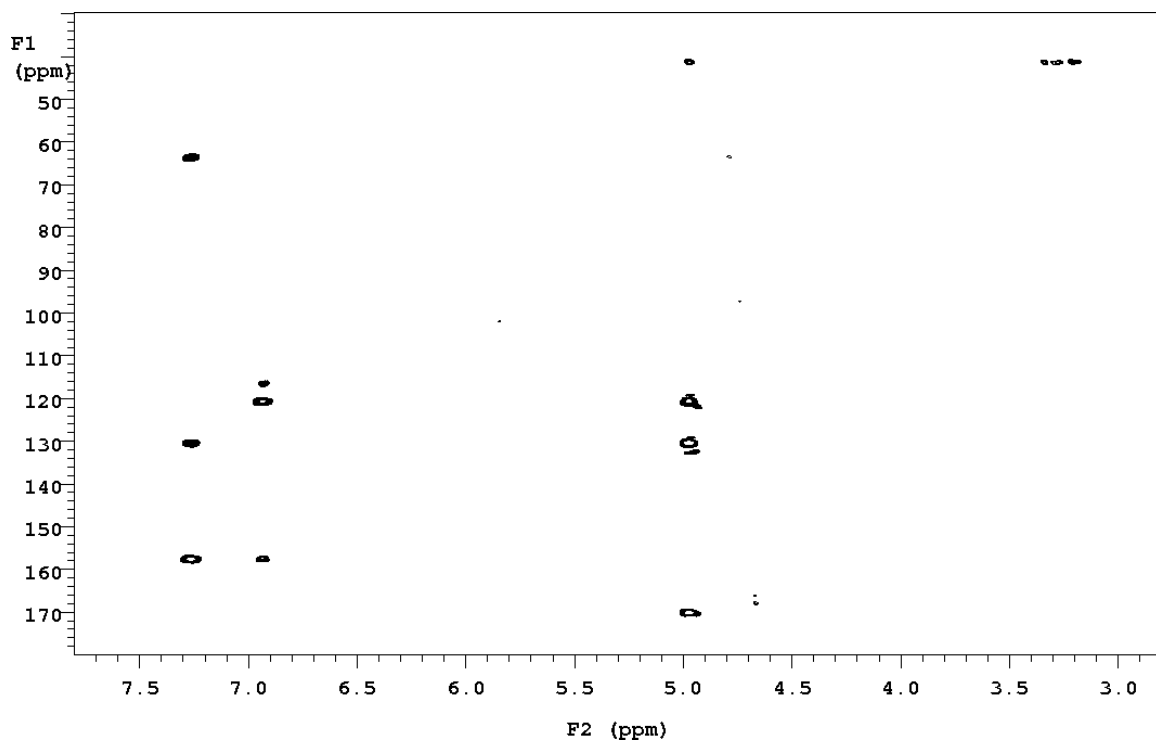

Figure 8. gHMBC spectrum of *p,p*-EDDHA.

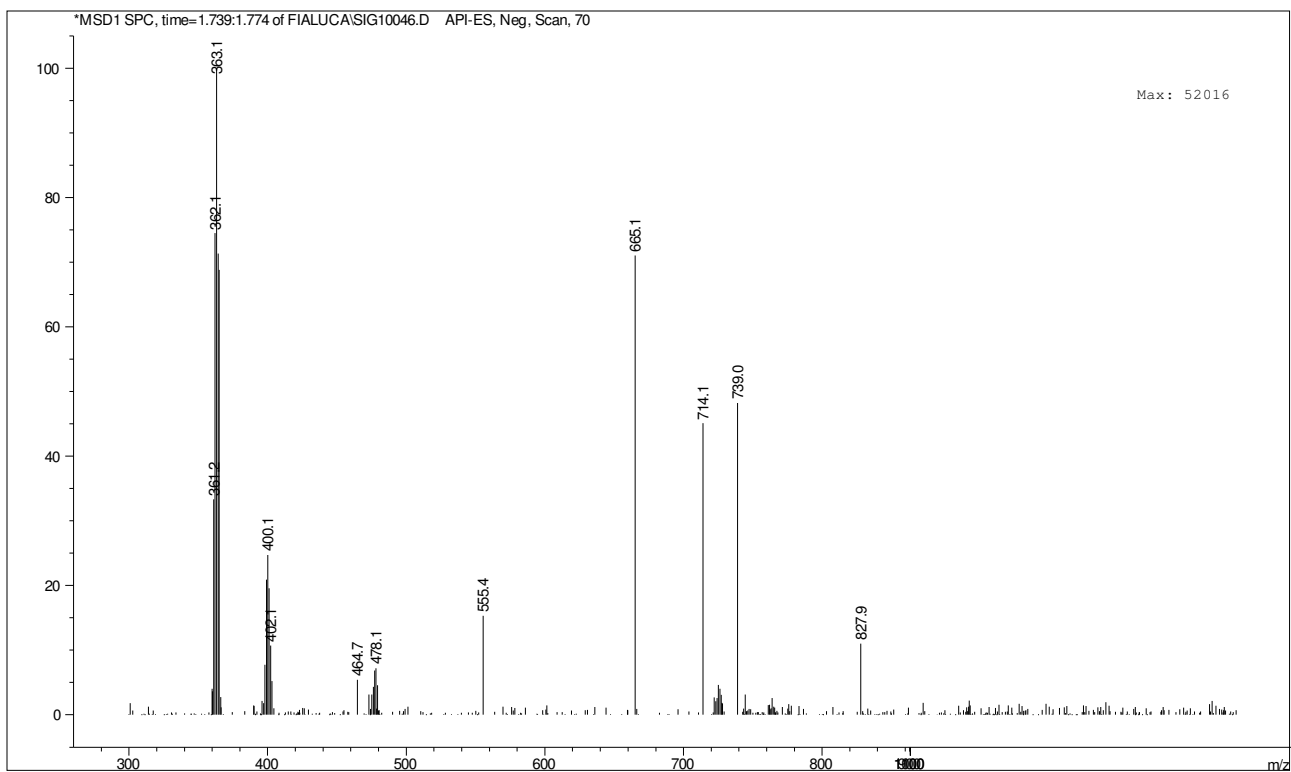

Figure 9. MS of *p,p*-EDDHA.

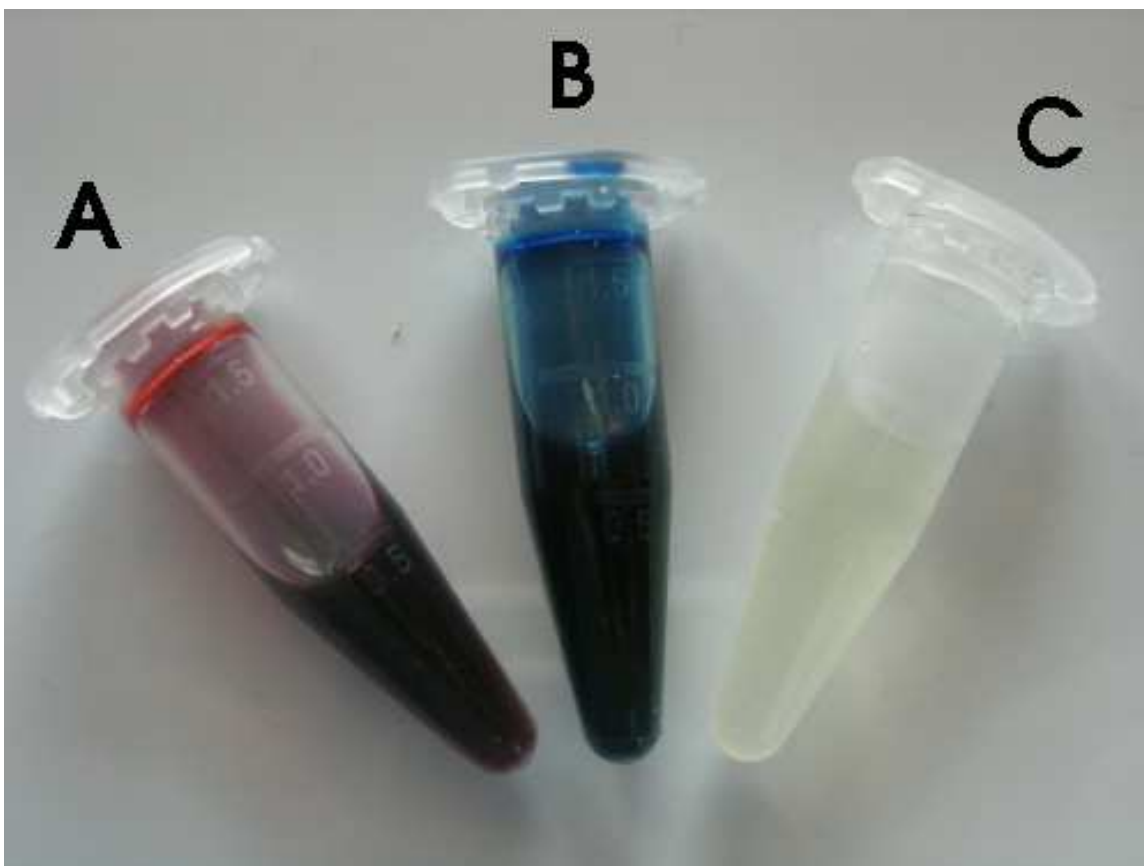

Figure 10. How the color of the solution changes along the deferration procedure: (A)  $\text{D}_2\text{O}$  solution of a fertilizer containing the EDDHA- $\text{Fe}^{3+}$  chelate; (B) same as A after addition of a solution of potassium ferrocyanide; (C) same as (B) at the end of the deferration procedure and ready to be analyzed by NMR.
